# Supplementary material for: Transcription-replication interactions reveal principles of bacterial genome regulation
Source: PubMed Central journal article supplement (PMC10081379; doi:10.21203/rs.3.rs-2724389/v1), 2023-03-31
Supplement: NIHPPRS2724389V1-supplement-1.pdf [file NIHPPRS2724389V1-supplement-1.pdf]

1431

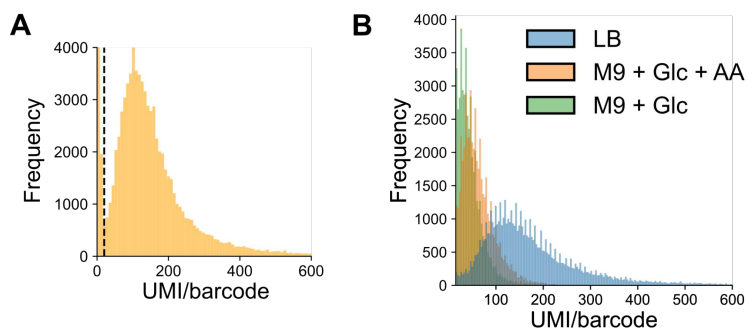

1432

1433

1434

1435

**Figure S1: mRNAs captured per cell by PETRI-seq.** mRNA captured is quantified as unique molecular identifiers (UMI) per unique cell barcode combination. **A)** *S. aureus* in TSB from Dataset D3. **B)** *E. coli* in different media from Dataset D1.

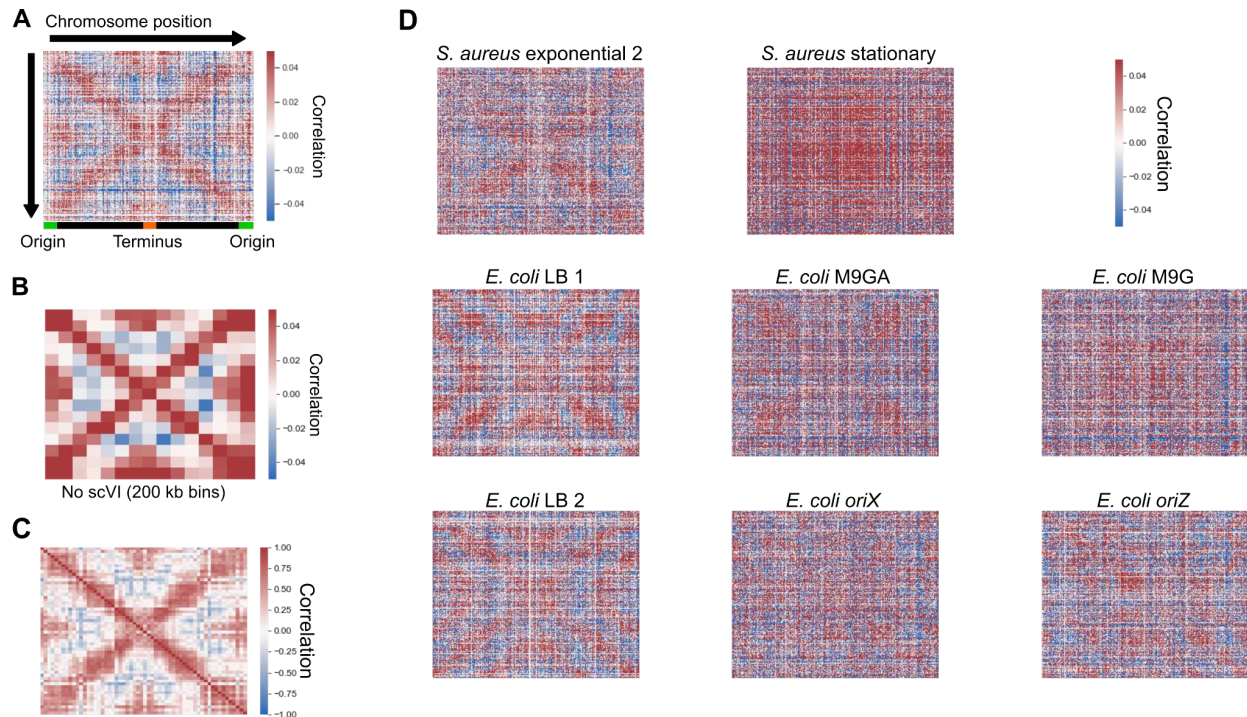

1436  
 1437  
 1438  
 1439  
 1440  
 1441  
 1442  
 1443

**Figure S2: Chromosome-wide gene-gene correlation patterns.** **A)** Spearman correlations from Fig. 1C without binning by chromosome position. **B)** Correlations from Fig. 1C without the use of scVI, binning in 200 kb bins by chromosome position. **C)** Spearman correlations in exponential *S. aureus* data from Dataset D4, averaged in 50 kb bins, as for Dataset D3 in Fig. 1C. **D)** Initial correlations from unbinned, scVI-predicted gene expression data. Sample “*S. aureus* exponential 2” is from Dataset D4, whereas *E. coli* LB replicates 1 and 2 are from Dataset D1 and Dataset D2, respectively.

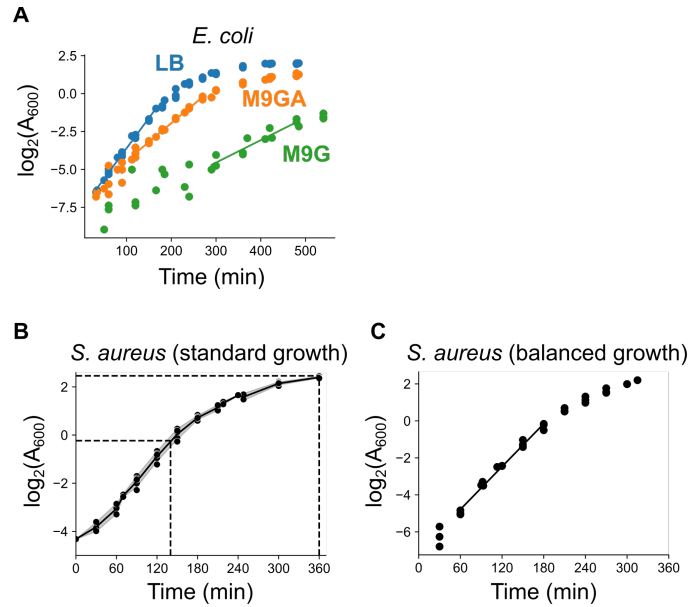

1444  
1445  
1446  
1447  
1448  
1449  
1450  
1451  
1452  
1453  
1454

**Figure S3: Growth curves of bacterial strains. A)** Growth of *E. coli* in three conditions. Doubling times were calculated based on the linear portions of growth (marked as fitted lines). Data are from four (LB and M9GA) or three (M9G) biological replicates. **B)** Growth of *S. aureus* under standard growth conditions. The time and  $\log_2(A_{600})$  values when exponential and stationary phase samples were taken are marked with dotted lines. The line is fitted to the mean at each time point, with the gray area representing standard deviation. Data are from five biological replicates. Doubling times for exponentially growing cells are estimated for the linear portion of the curve (~60-150 min). **C)** Growth of *S. aureus* under balanced growth conditions (see Materials & Methods). The black line indicates the linear portion from which doubling time was estimated. Data are from three biological replicates.



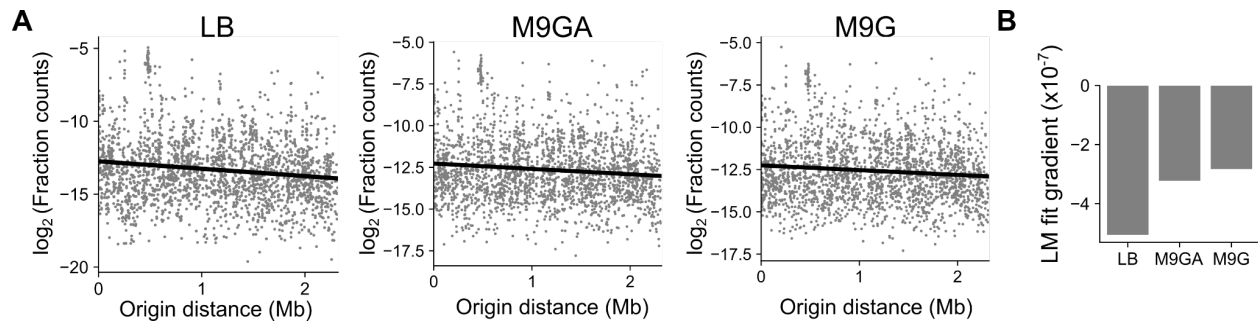

1469  
 1470  
 1471  
 1472  
 1473  
 1474  
 1475  
 1476  
 1477

**Figure S5: The relationship between origin distance and expression levels. A)** For each *E. coli* growth condition, the average fraction of total mRNA UMI from each gene was calculated and  $\log_2$ -transformed. A linear regression model (black line) was fitted between  $\log_2$ -fraction counts and origin distance. **B)** The gradient of the linear model fits in **(A)**. Note that in each case, there is a negative relationship, with a steeper gradient for faster growth rates. This is expected given that at fast growth rates, genes near the origin may attain higher copy number states ( $>2$ ) than at slow growth rates. Spearman correlations are  $-0.13$  (LB,  $P = 3.8 \times 10^{-10}$ ),  $-0.09$  (M9GA,  $P = 2.2 \times 10^{-5}$ ), and  $-0.07$  (M9G,  $P = 6.0 \times 10^{-4}$ ).

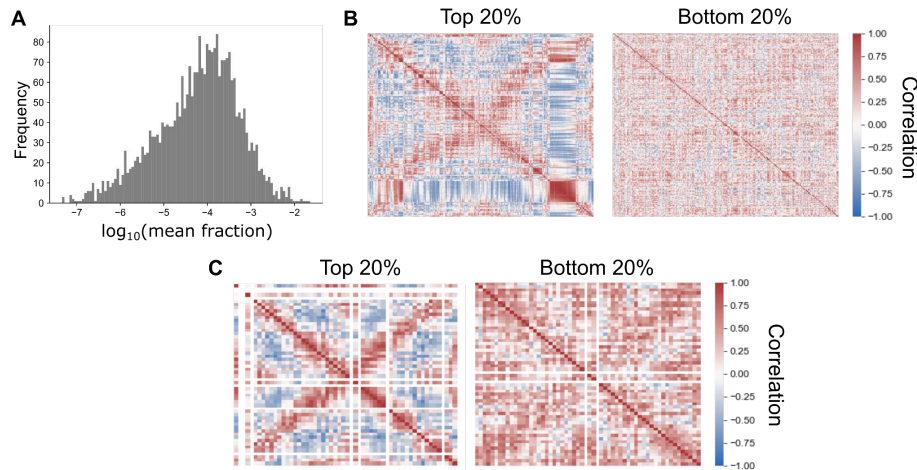

1478  
 1479 **Figure S6: Evidence indicating that the global gene covariance pattern results directly**  
 1480 **from gene expression. A)** Histogram showing that length-adjusted average gene expression  
 1481 varies over several orders of magnitude. This is a broad distribution that would not be expected  
 1482 from genomic DNA. Raw expression counts were normalized by library size (to sum to 1 per  
 1483 barcode) and the average expression was calculated. Length correction was performed as  
 1484 expression divided by gene length then multiplied by median gene length. **B)** Spearman  
 1485 correlations between genes in the top and bottom 20% of genes. Genes are arranged by  
 1486 chromosome order. **C)** Spearman correlations between top and bottom 20% of genes after  
 1487 averaging expression in 50 kb bins as in Fig. 1C. For **(C & D)**, if the pattern was driven by low-  
 1488 level contaminating genomic DNA, it would be expected to be more evident in low-expressed  
 1489 genes (since a higher proportion of reads from these genes should come from genomic DNA)  
 1490 than in high-expressed genes. The opposite is true, with a much stronger pattern in high-  
 1491 expressed genes (presumably due to less noise in these measurements). Taken together, these  
 1492 observations strongly support that the pattern is driven by variation in the transcriptome rather  
 1493 than contaminating genomic DNA.

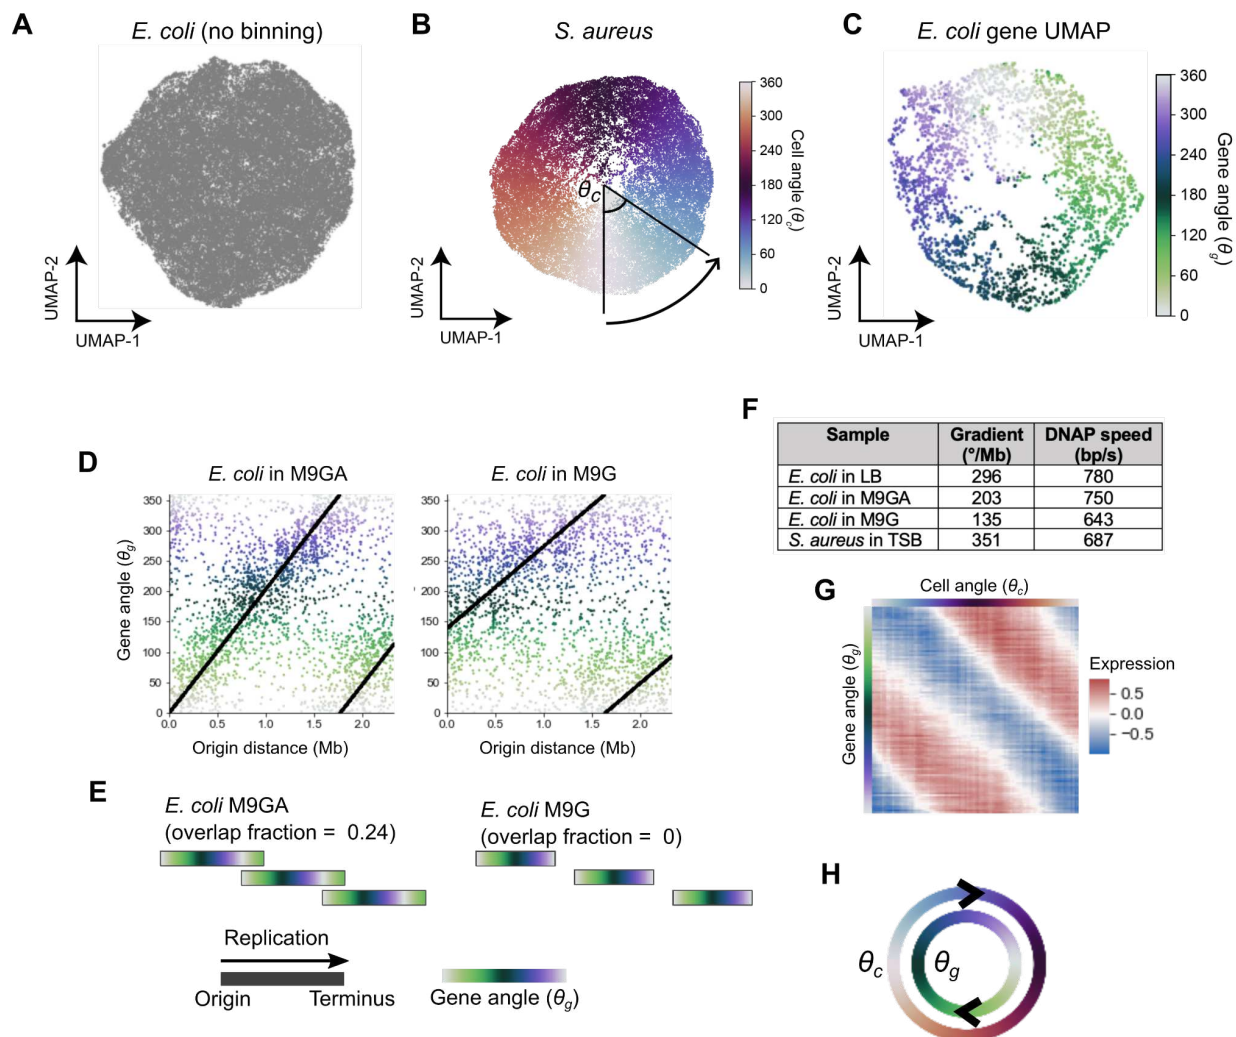

1494  
 1495 **Figure S7: Cell and gene angle analysis to model replication-dependent gene expression.**  
 1496 **A)** UMAP analysis of LB-grown *E. coli* based on scVI-predicted expression. **B)** UMAP of *S.*  
 1497 *aureus* with gene expression averaged in 50 kb bins by chromosome position. Cells are colored  
 1498 by the cell angle  $\theta_c$  between UMAP dimensions relative to the center of the projection. **C)** UMAP  
 1499 of *E. coli* genes, performed on the same data as the PCA in Fig. 2D. Gene angles shown are  
 1500 those derived from PCA. **D)** The relationship between  $\theta_g$  and origin distance for *E. coli* grown in  
 1501 M9 + glucose + amino acids (M9GA) or M9 + glucose (M9G). The black line indicates the model  
 1502 fit as described in Materials & Methods Section “Modeling the gene angle-origin distance  
 1503 relationship”. **E)** Predicted replication patterns as for Fig. 2G but for *E. coli* under slower growth  
 1504 conditions. **F)** Gradients of the gene angle-origin distance relationship and estimates of DNA  
 1505 polymerase speed from these gradients. See Materials & Methods for details. **G)** Expression in  
 1506 LB-grown *E. coli* is first averaged in 100 bins by  $\theta_c$  then averaged in 100 bins by  $\theta_g$  to yield the  
 1507 100 x 100 matrix represented here as a heatmap. This is used to train the model to predict gene  
 1508 expression at a given point in the cell cycle ( $\theta_c$ ) for a given gene ( $\theta_g$ ). **H)** Conceptual  
 1509 representation of the cell cycle expression parameterization. Cells are ordered in their cell cycle  
 1510 state by  $\theta_c$ , whereas genes are ordered by their cell cycle expression by  $\theta_g$ . Cell cycle  
 1511 expression can be described as the concurrent cycling of cells and genes ordered by these  
 1512 metrics.  
 1513

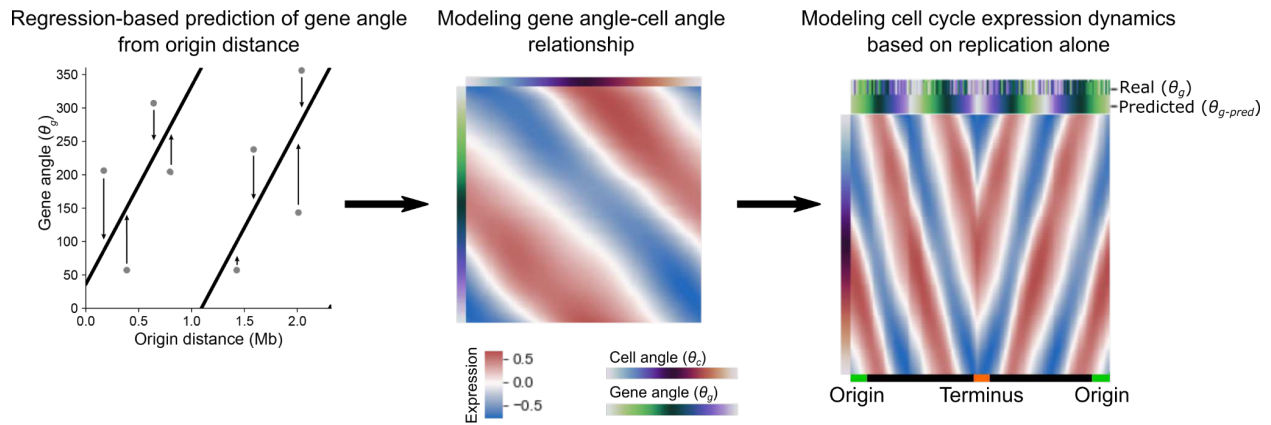

1514  
 1515 **Figure S8: Predicting gene expression dynamics based on distance from the origin.** The  
 1516 following pipeline predicts cell cycle expression for a given gene based only on its distance from  
 1517 the origin of replication. A regression model predicts gene angle  $\theta_{g-pred}$  based on origin distance  
 1518 alone (*left*) and this is converted into a prediction of expression by cell angle  $\theta_c$  using a second  
 1519 regression model (*middle*). Ordering genes by chromosome position (*right*) shows a smoothed  
 1520 version of the expression pattern in Fig. 2B. The bar at the top of this figure shows the real and  
 1521 predicted gene angles. Data are from *E. coli* grown in LB. See Materials & Methods for full details.



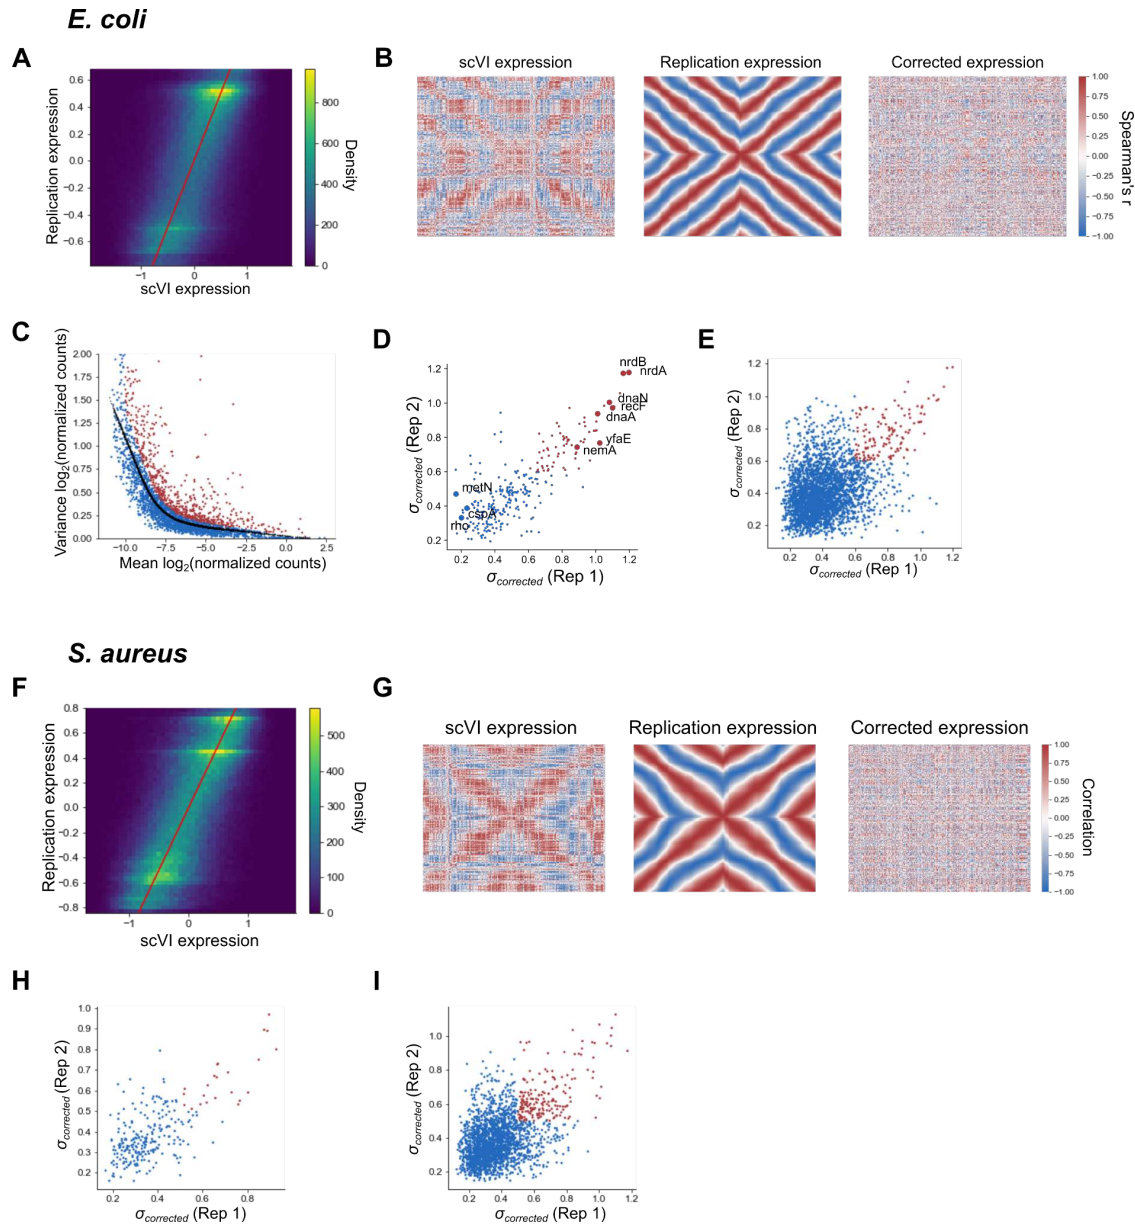

1522  
 1523  
 1524 **Figure S9: Correcting for and measuring divergence from predicted replication-**  
 1525 **associated patterns. A)** Two-dimensional histogram for *E. coli* showing the relationship  
 1526 between observed expression from scVI and replication-predicted expression. Expression is  
 1527 averaged in 100 bins by cell angle  $\theta_c$ . The red line indicates  $x = y$  i.e. the case where expression  
 1528 in both matrices is identical. Overall, there is a rough 1:1 correspondence between observed  
 1529 and predicted expression, indicating a good model fit. **B)** Gene-gene correlations in LB-grown *E.*  
 1530 *coli* across  $\theta_c$ -binned expression data (100 bins) for the full scVI observed model (*left*), the  
 1531 replication-only model (*middle*), and the corrected model that is the difference of the two  
 1532 expression matrices (*right*). **C)** The mean-variance relationship in *E. coli* of log-transformed  
 1533 normalized counts. The black line indicates the locally weighted scatterplot smoothing  
 1534 (LOWESS)-fitted values and red points are genes classed as highly variable. See Materials &  
 1535 Methods for further details. **D)** Comparison of the divergence score  $\sigma_{corrected}$  between LB-grown  
 1536 *E. coli* in Datasets D1 & D2 of genes classed as highly variable in both datasets (287 genes).  
 1537 Red indicates replication-divergent genes ( $\sigma_{corrected} > 0.6$ ). **E)** Comparison of  $\sigma_{corrected}$  (standard  
 deviation of divergence from the replication model) between LB-grown *E. coli* in Dataset D1 and

1538 Dataset D2 of all genes present in both datasets. Red indicates  $\sigma_{corrected} > 0.6$  in both datasets,  
1539 meaning that they are considered replication-divergent. The Pearson correlation between  
1540 replicates is 0.38. **F)** Two-dimensional histogram as in **(A)** but for *S. aureus*. **G)** Gene-gene  
1541 correlation plots as for **(B)** but for *S. aureus*. **H & I)** Comparison of  $\sigma_{corrected}$  (standard deviation  
1542 of divergence from the replication model) between *S. aureus* in Dataset D5 and Dataset D6 for  
1543 highly variable genes in both datasets **(H)** (Pearson's  $r = 0.66$ ) and all genes **(I)** (Pearson's  $r =$   
1544  $0.48$ ). Red indicates  $\sigma_{corrected} > 0.5$  in both datasets, meaning that they are considered  
1545 replication-divergent.

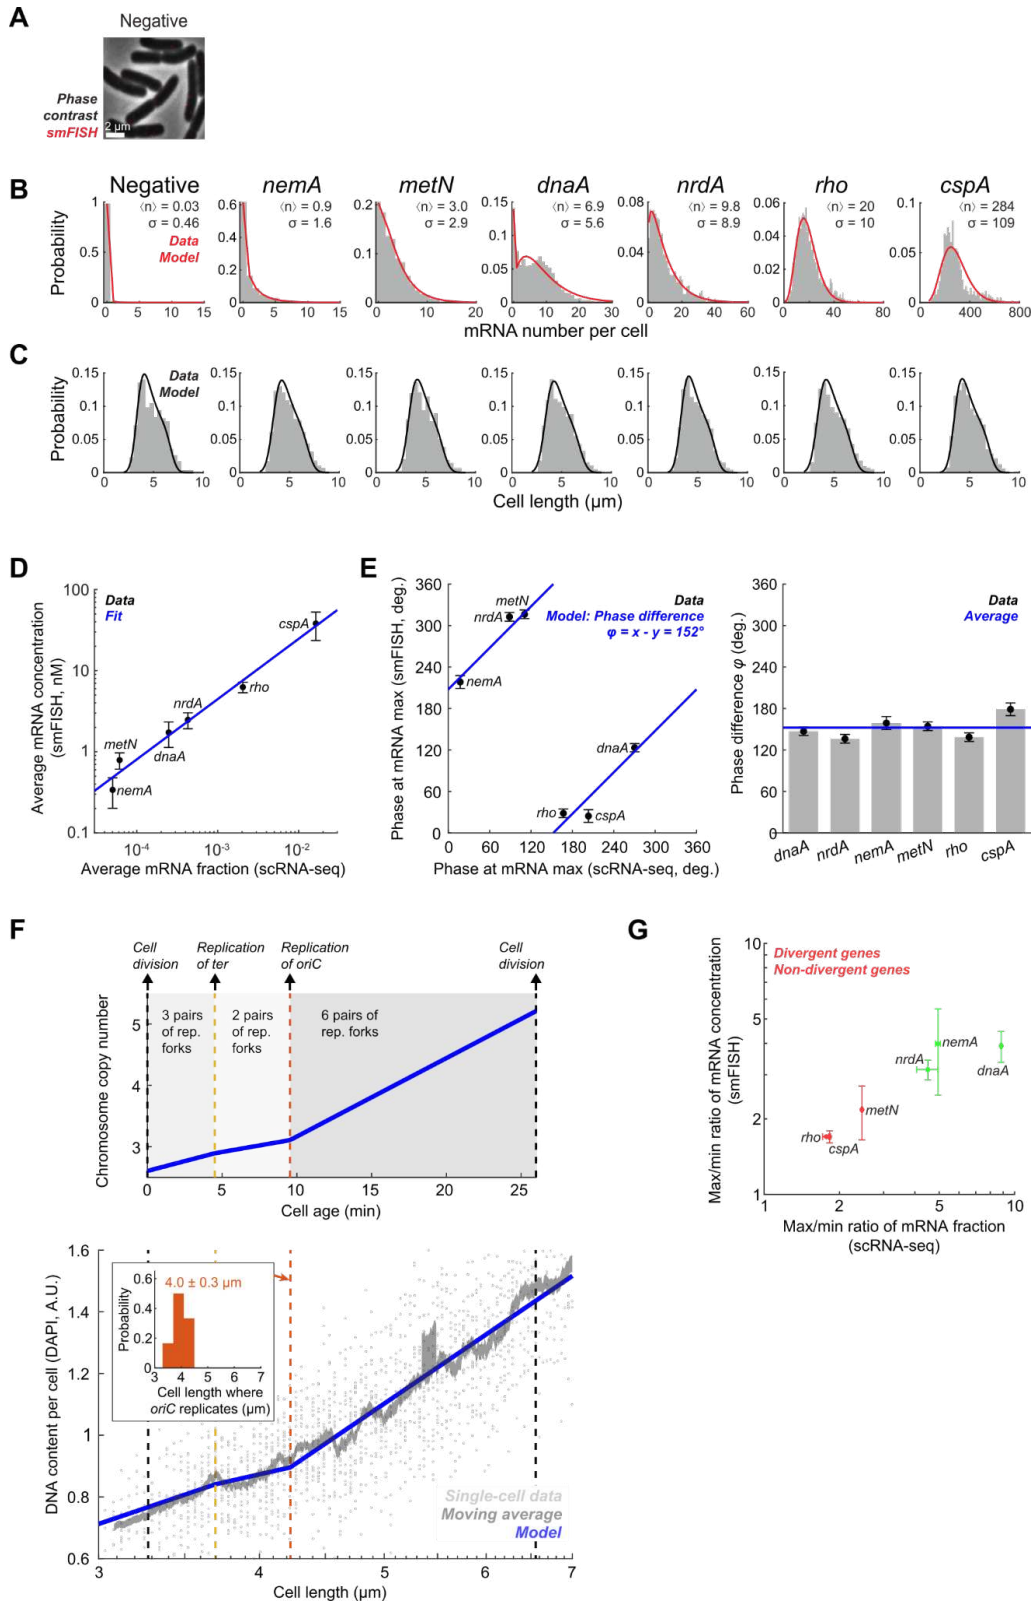

1546  
1547  
1548  
1549

**Figure S10: smFISH analysis of cell cycle gene expression correlates with phase-shifted scRNA-seq data.** **A)** Negative control for smFISH labeling. *E. coli* cells labeled against bacteriophage lambda *cI* mRNA. smFISH signal is shown using the same contrast as in Fig. 3,

1550 B & D. See Section “smFISH”. **B)** The distribution of mRNA copy-number per cell for each gene.  
1551 See Section “mRNA quantification”. Red line, fit to a negative binomial distribution plus a “zero  
1552 spike”<sup>10</sup>. **C)** The distribution of cell length in each sample. Black line, fit to the theoretical model  
1553 of <sup>87</sup>, see Section “Modeling the distribution of cell length”. **D)** Comparison of the population-  
1554 averaged mRNA fraction, as measured using scRNA-seq, with mRNA concentration, as  
1555 measured using smFISH. Markers and error bars indicate mean  $\pm$  SD from two datasets of each  
1556 method. Blue line, fit to a function  $y = ax^b$ . **E)** Estimation of the cell-cycle phase difference  
1557 between scRNA-seq and smFISH. The phase of each dataset was estimated as described in  
1558 Section “Cell-cycle analysis of mRNA concentration”. *Left*, markers and error bars indicate  
1559 mean  $\pm$  SEM from two datasets of each method. Blue line, fit to a linear function, indicating a  
1560 constant phase difference  $\varphi$ . *Right*, the estimated phase difference across the six genes  
1561 examined. **F)** Top, the theoretically predicted cellular DNA contents as a function of cell age,  
1562 see Section “Inferring cell-cycle phase from the DAPI signal”. Bottom, DAPI-measured DNA  
1563 content per cell as a function of cell length. Single-cell data was binned based on cell length  
1564 (moving average  $\pm$  SEM, 21 cells per bin), Blue line, fit to the theoretical model. Inset, the  
1565 distribution of the inferred cell length where *oriC* replicates, estimated from all smFISH samples.  
1566 **G)** Divergent genes exhibit a larger amplitude of cell-cycle fluctuations. The ratio between the  
1567 maximum and minimum expression level of different genes, as measured using scRNA-seq and  
1568 smFISH. The mRNA fraction (scRNA-seq) and concentration (smFISH) were obtained as in Fig.  
1569 3 B & D, 2nd and 3rd columns. The maximum and minimum levels were determined from the  
1570 binned data. Markers and error bars indicate mean  $\pm$  SD from two datasets of each method.

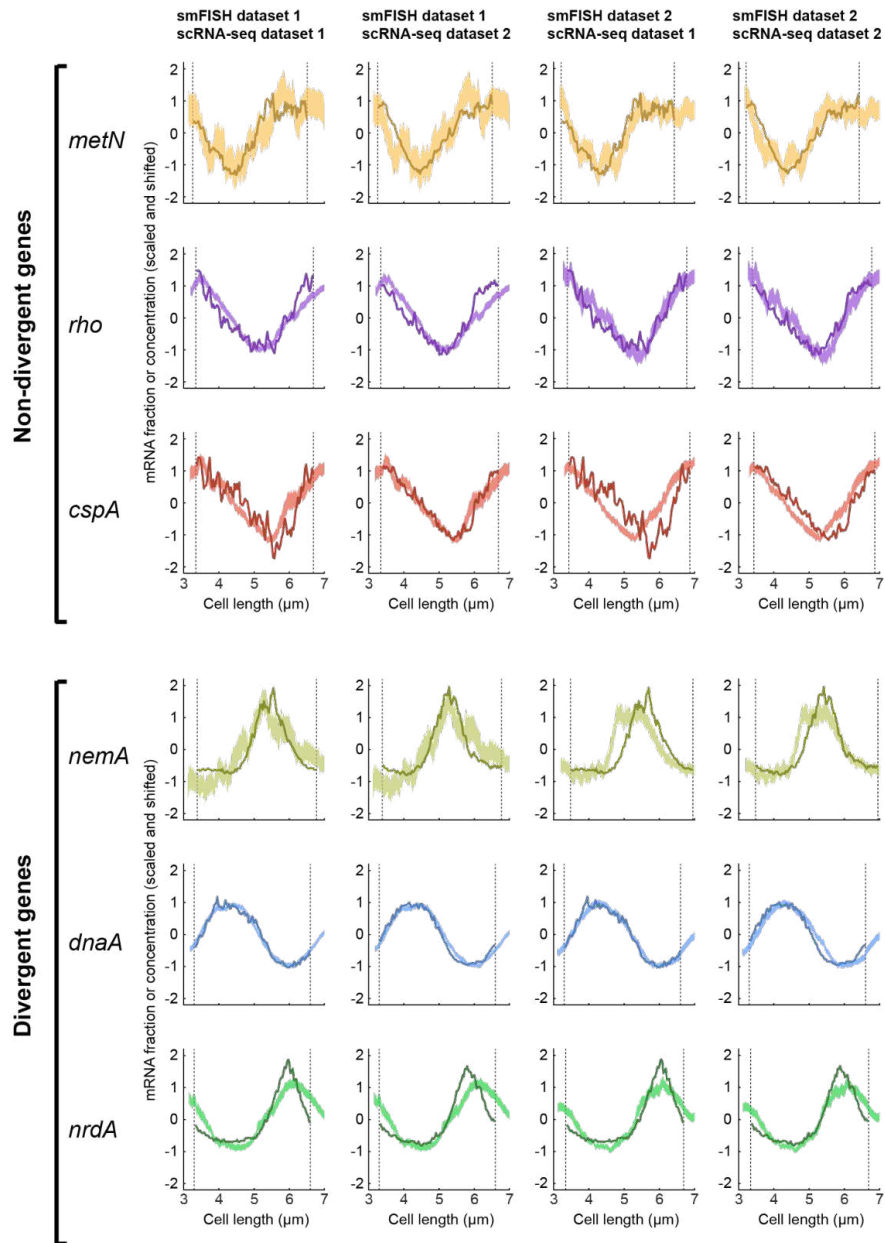

1571  
1572  
1573  
1574  
1575

**Figure S11: Cell cycle analysis of smFISH and scRNA-seq shows good agreement across biological replicates.** Pairwise comparison between two smFISH and two scRNA-seq datasets. Analysis as in Fig. 3B & D, 4th column. See Section “Cell-cycle analysis of mRNA concentration”.

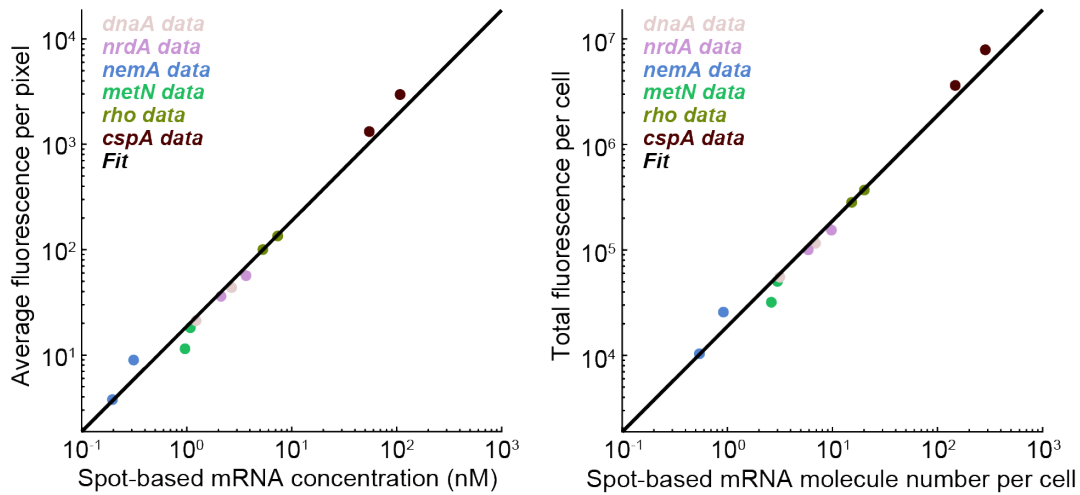

1576  
1577  
1578  
1579  
1580  
1581  
1582

**Figure S12: Consistency between spot-based and cell-based smFISH quantification.** Comparison of the mRNA levels inferred from smFISH data using spot-based and cell-based mRNA quantification. Both methods are described in Section “mRNA quantification”. *Left*, mRNA concentration. *Right*, mRNA copy number per cell. Markers indicate mean values from each smFISH sample (Error bars are smaller than marker size). Black line, fit to a linear function.

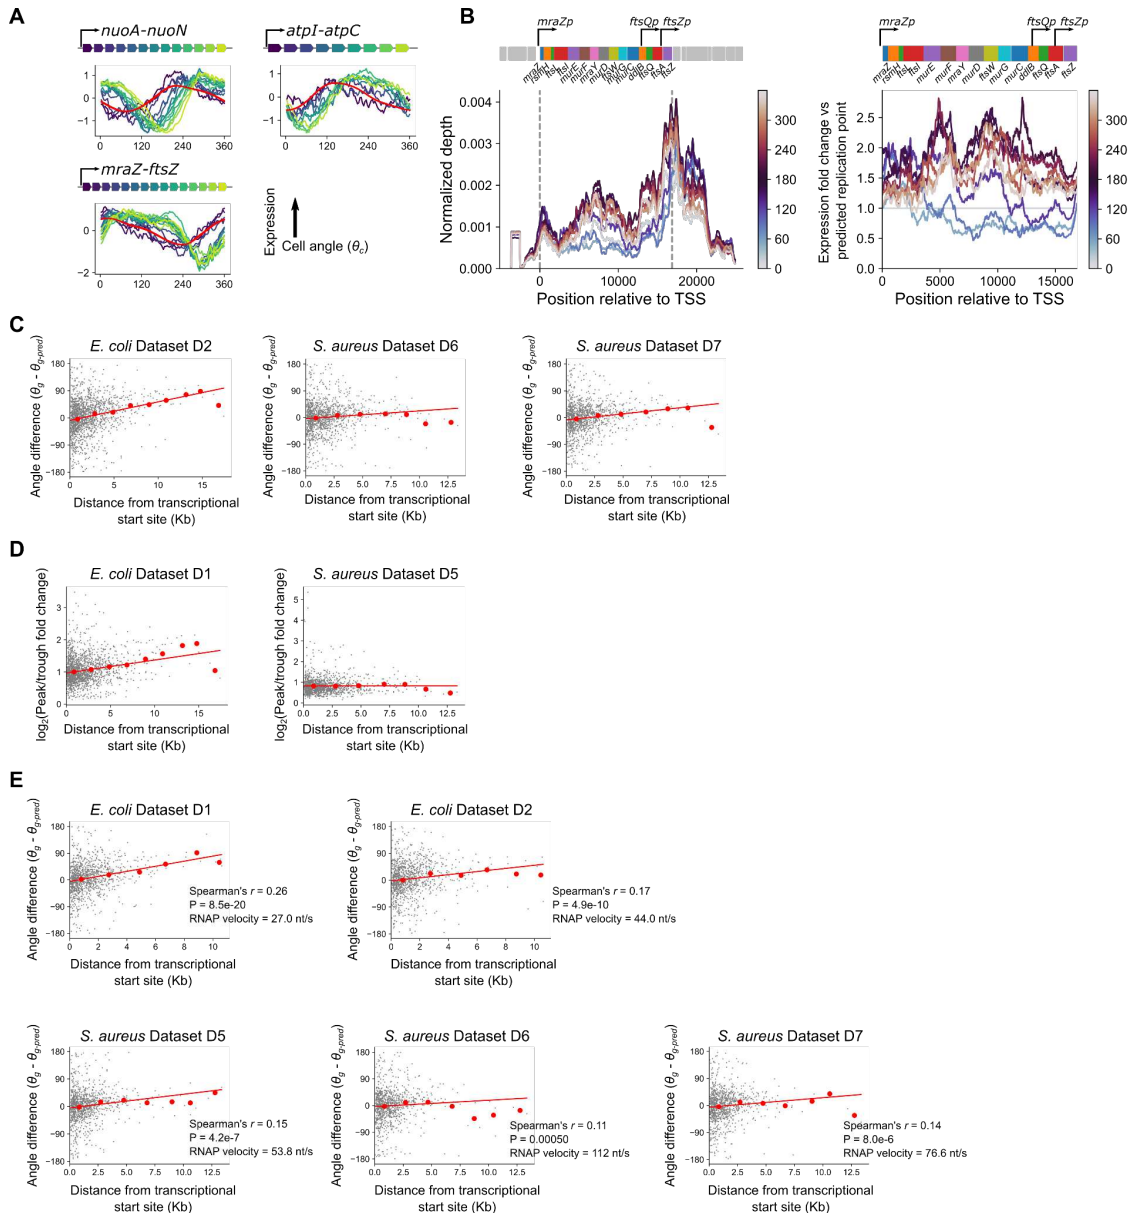

1583  
1584  
1585  
1586  
1587  
1588  
1589  
1590  
1591  
1592  
1593  
1594  
1595  
1596  
1597  
1598

**Figure S13: The relationship between distance from the transcriptional start site and gene expression timing and amplitude.** **A)** Cell cycle gene expression plots for operons showing “delayed” genes as in Fig. 4B but for LB-grown WT *E. coli* from Dataset D2. The red line indicates predicted expression. **B)** Normalized per-base read depth at the *mraZ-ftsZ* locus. *Left:* Normalized expression as in Fig. 4D. *Right:* Fold-change relative to expression at the predicted time of replication, as in Fig. 4E. Schematic figures of the locus depict a simplified version since several internal promoters have been identified. **C)** Plots of maximum distance from a transcriptional start site against difference between predicted and observed angles as in Fig. 4C. Red line indicates the linear model fit and red points indicate averages of 2 kb bins. Data are shown for additional *E. coli* and *S. aureus* replicates. **D)** Plots as in (C) but of maximum distance from a transcriptional start site against the  $\log_2$ -transformed peak/trough ratio in gene expression, calculated as described in Materials & Methods. **E)** Plots as in (C) but using manual operon annotation. Here, any tandem, contiguous stretch of genes with an intergenic distance less than 40 bp is considered an operon. Transcriptional start sites are defined as the start position of the first gene in the operon.

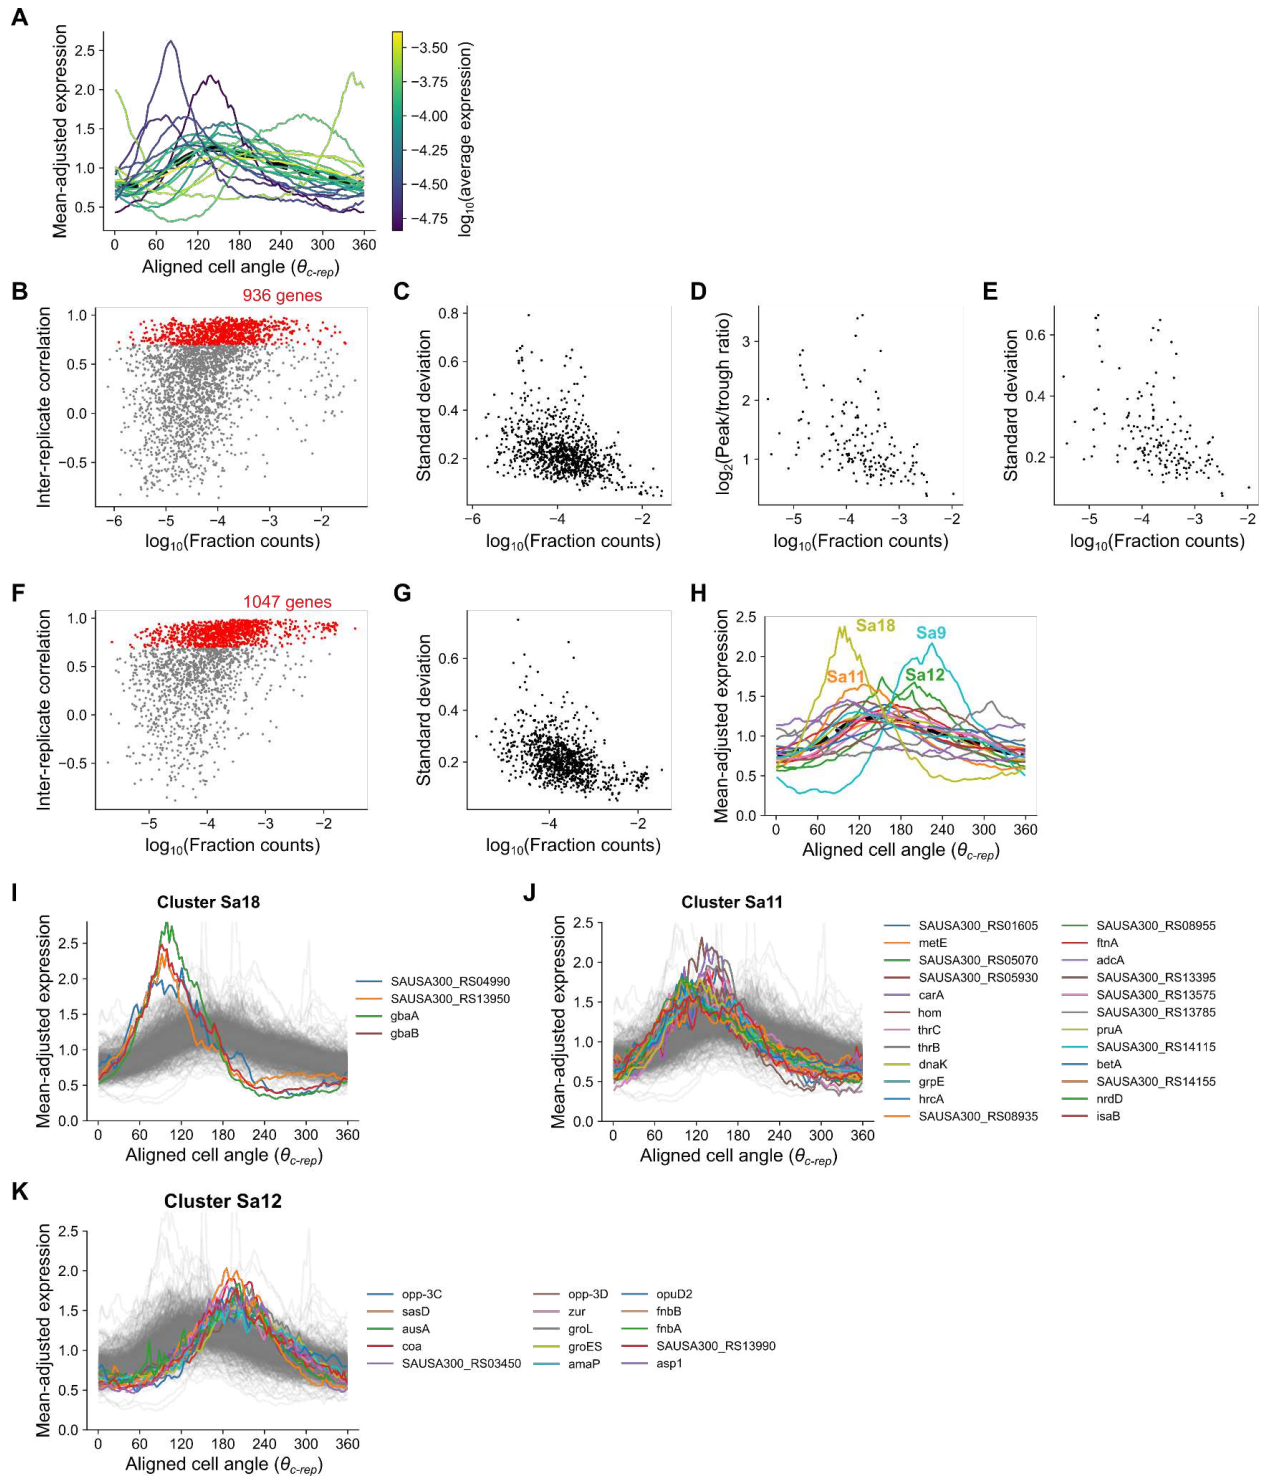

1599  
1600  
1601  
1602  
1603  
1604  
1605  
1606

**Figure S14: Expression-amplitude relationships and *S. aureus* cluster profiles.** **A)** Clusters as in Fig. 5B but colored according to their average, length-corrected expression. This was determined by a gene's mean fraction of total mRNA that was length-corrected by dividing by its length and multiplying by the median gene length across genes. **B)** Scatter plot of length-corrected mean fraction counts (i.e. fraction of a gene within the whole transcriptome) against Spearman correlation in *E. coli*. Spearman correlations for each gene were calculated as the inter-replicate correlation between cell cycle gene expression measurements averaged in 100



1607 bins by  $\theta_c$  (replicates from Datasets D1 & D2). Red genes indicate the reproducible genes used  
1608 in Fig. 5. **C)** Length-corrected mean expression against standard deviation across expression  
1609 averaged in 100 bins by  $\theta_c$ . **D & E)** Plots as in Fig. 5E and **(C)** but including only those genes  
1610 with Spearman R > 0.9 (instead of 0.7). **F)** Plot as in **(B)** but for *S. aureus* (replicates from  
1611 Datasets D5 & D6). **G)** Plot as in **(C)** but for *S. aureus*. **H)** Plot as in Fig. 5B except for mean  
1612 expression of *S. aureus* clusters. Genes situated on mobile genetic elements were removed  
1613 prior to clustering analysis. **I-K)** Plots of individual genes from clusters indicated in **(H)**.

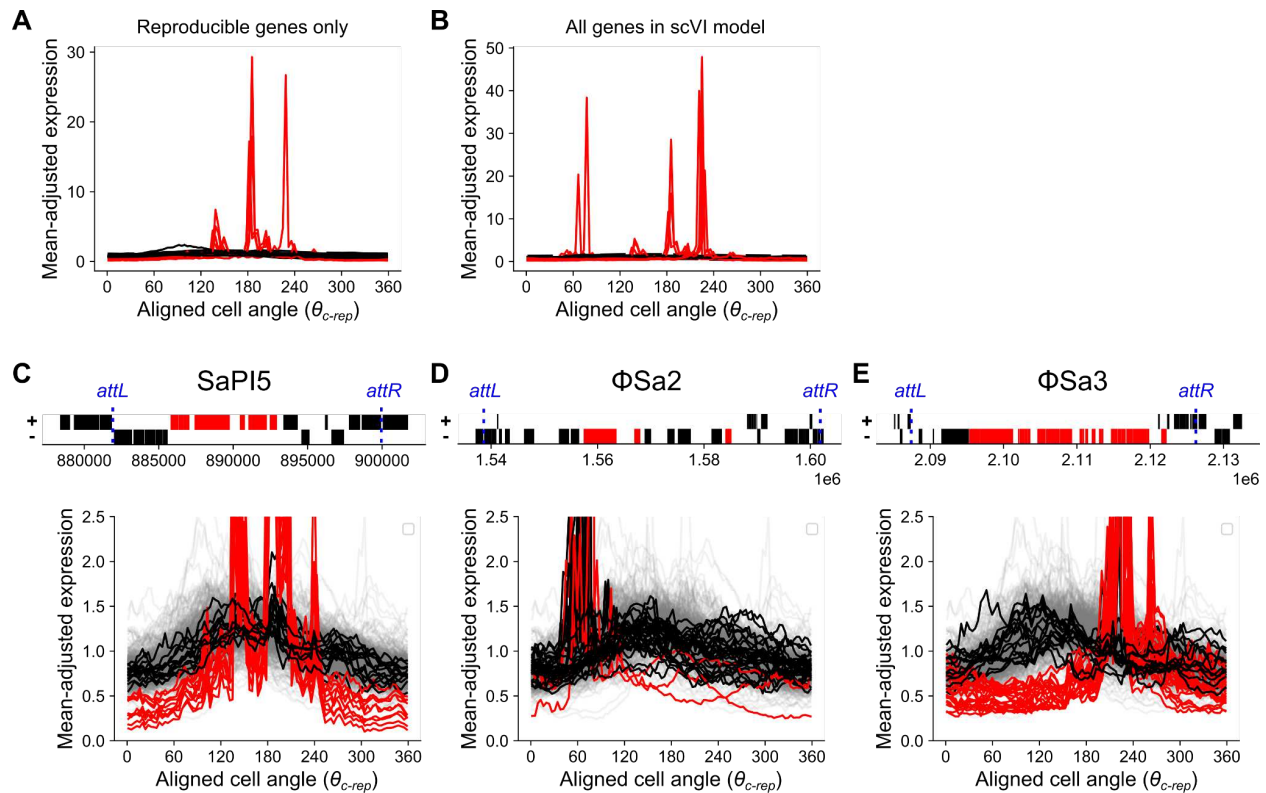

1614  
 1615 **Figure S15: Core genes of mobile genetic elements show highly divergent expression**  
 1616 **patterns. A)** Mean cluster expression of reproducible genes partitioned into 20 clusters by  
 1617 aligned gene expression ( $\theta_{c-rep}$ ). Clusters in red are those that only contain genes located within  
 1618 MGEs. **B)** Plot as in **(A)** but with clustering performed on all genes included in the scVI model  
 1619 (regardless of reproducibility). These cluster assignments are used for **(C-E)**. **C-E)** Expression  
 1620 of genes within mobile elements. Genes are colored based on whether they are in MGE-  
 1621 exclusive clusters from **(B)** (red) or other clusters (black). *Top:* schematic figure of MGE gene  
 1622 content. The  $x$ -axis represents chromosomal coordinate and + and - strands are plotted  
 1623 separately by  $y$ -axis position. Predicted attachment sites *attL* and *attR* denote the predicted  
 1624 boundaries of the MGE and are annotated in blue. Annotation for MGEs was taken from the  
 1625 online tool Phaster<sup>92</sup>. *Bottom:* Plots of MGE genes by aligned gene expression ( $\theta_{c-rep}$ ) as  
 1626 represented in Fig. 5. Gray genes represent the non-MGE background. Note that phage  $\Phi$ Sa2  
 1627 is disabled and expression of its MGE-specific (“red”) cluster genes is low (0.002% of cells  
 1628 contain at least three transcripts) compared to the staphylococcal pathogenicity island (SaPI) 5  
 1629 (0.4%) and phage  $\Phi$ Sa3 (0.07%), potentially contributing to the less clear delineation between  
 1630 expression profiles by gene type. MGE-specific expression patterns may arise due to MGE  
 1631 mobilization and these patterns may represent rare events that are not effectively captured by  
 1632 our cell cycle analysis, meaning that the plots here should be interpreted with caution.

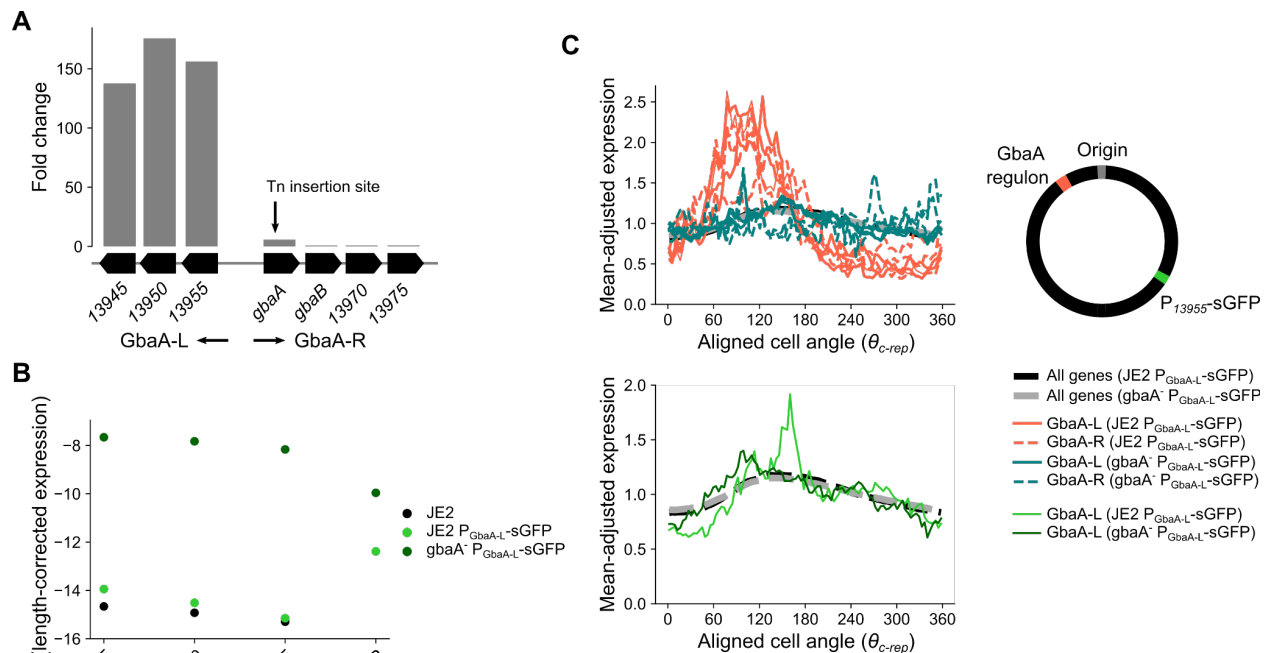

1633  
1634  
1635  
1636  
1637  
1638  
1639  
1640  
1641  
1642  
1643  
1644  
1645  
1646  
1647  
1648  
1649

**Figure S16: Effects of *gbaA* disruption on cell cycle gene expression. A)** Expression fold change of genes in the GbaA regulon after *gbaA* transposon insertion. Genes of the GbaA-L operon increase in expression >100-fold. However, due to the location of the transposon insertion towards the 5' end of *gbaA*, induction of GbaA-R genes is not observed. Genes with names starting with SAUSA300\_RS are truncated to give only the unique number. **B)** Average expression of GbaA-L genes and sGFP in reporter strains (compared to JE2 in measurements from the same experiment). Average expression measured as fraction of total mRNA was length-corrected as elsewhere by dividing by the gene length and multiplying by the median gene length across all genes. Note that sGFP expression in JE2  $P_{GbaA-L}$ -sGFP is approximately fourfold higher than that of GbaA-L genes, and the derepressed form in  $gbaA^- P_{GbaA-L}$ -sGFP is also fourfold lower (possibly reflecting lower copy number due to its further distance from the origin). Therefore, while repression of the GbaA-L locus is ~96-fold, repression of sGFP by GbaA is only 5.3-fold. **C)** Comparison of aligned expression ( $\theta_{c-rep}$ ) (as in Fig. 5) for GbaA regulon genes and sGFP in the two reporter constructs. Thick black and gray lines represent average expression across all reproducible genes. The schematic figure represents the relative positions of the GbaA regulon and the  $P_{GbaA-L}$ -sGFP integration site.

1650  
1651

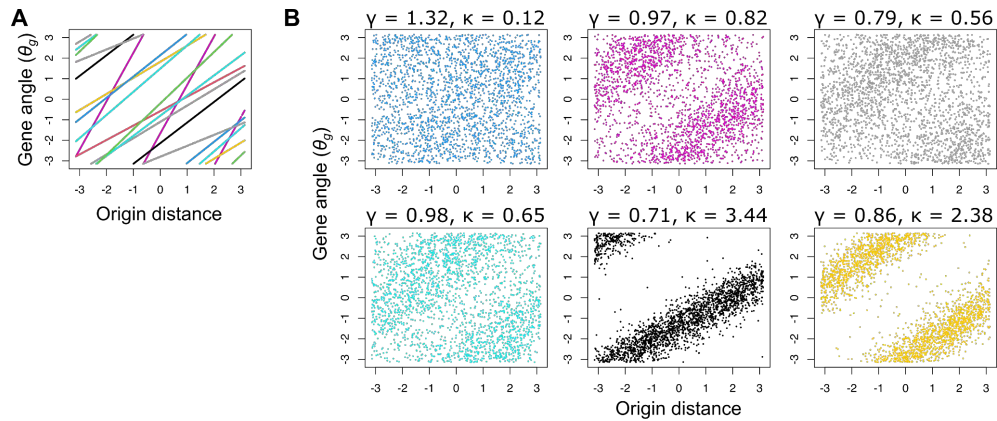

1652  
1653  
1654  
1655  
1656  
1657  
1658  
1659  
1660  
1661

**Figure S17: Sampling from the prior of the gene angle-origin distance regression model.**

Based on the model and priors specified in Materials & Methods, values were randomly sampled from the prior and used to predict either the expected gene angle  $A$  (**A**) or the predicted value of gene angle  $\theta_g$  after von Mises sampling (**B**). For each sampled set of parameters in (**B**) the gradient  $\gamma$  and concentration parameter  $\kappa$  are shown. Both  $\theta_g$  and origin distance  $D$  are standardized to the range  $-\pi$  to  $\pi$  as per the model requirements. Overall, the prior assumptions of the model are that there is a positive, linear relationship between  $\theta_g$  and  $D$ , but there is considerable flexibility regarding the gradient (and hence degree of wrapping), value of  $\theta_g$  at  $D = 0$ , and noise.

1662 **Table S1: Information about datasets and samples used.** A<sub>600</sub> refers to the optical density at  
 1663 the time of harvesting. \*Growth *E. coli* MG1655 in LB was measured in a separate series of  
 1664 experiments for each dataset.

| Dataset | Sample            | Strain                                                                                                 | Medium                      | A <sub>600</sub> | Doubling time (min) | # cells            | Median mRNA UMI/barcode |
|---------|-------------------|--------------------------------------------------------------------------------------------------------|-----------------------------|------------------|---------------------|--------------------|-------------------------|
| D1      | eco_lb_1          | <i>E. coli</i> MG1655                                                                                  | LB                          | 0.15             | 26.0 ± 1.3 (n = 4)* | 57,627             | 152                     |
|         | eco_mga_1         | <i>E. coli</i> MG1655                                                                                  | M9GA                        | 0.185            | 39.4 ± 2.3 (n = 4)  | 50,920             | 56                      |
|         | eco_mg_1          | <i>E. coli</i> MG1655                                                                                  | M9G                         | 0.062            | 69.1 ± 9.8 (n = 3)  | 45,898             | 40                      |
| D2      | eco_lb_2          | <i>E. coli</i> MG1655                                                                                  | LB                          | 0.152            | 27.0 ± 1.6 (n = 4)* | 69,396             | 93                      |
|         | eco_orix_1        | <i>E. coli</i> MG1655<br>Δ <i>lacI</i> ZYA oriX-<> <sup>25,27</sup>                                    | LB                          | 0.127            | 27.2 ± 2.4 (n = 4)  | 25,967             | 97                      |
|         | eco_oriz_1        | <i>E. coli</i> MG1655<br>Δ <i>lacI</i> ZYA oriZ-<> <sup>26</sup>                                       | LB                          | 0.14             | 26.6 ± 2.1 (n = 4)  | 32,151             | 100                     |
| D3      | sau_tsb_1         | <i>S. aureus</i> USA300 LAC                                                                            | TSB                         | 0.97             | 30.1 ± 0.8 (n = 5)  | 73,053             | 135                     |
| D4      | sau_exp_plus      | <i>S. aureus</i> USA300 LAC                                                                            | TSB                         | 1.12             | 30.1 ± 0.8 (n = 5)  | 13,075             | 87                      |
|         | sau_exp_minus     | <i>S. aureus</i> USA300 LAC                                                                            | TSB                         | 1.12             | 30.1 ± 0.8 (n = 5)  | 8,182              | 57                      |
|         | sau_stat_plus     | <i>S. aureus</i> USA300 LAC                                                                            | TSB                         | 5.76             | NA                  | 40,772             | 27                      |
|         | sau_stat_minus    | <i>S. aureus</i> USA300 LAC                                                                            | TSB                         | 5.76             | NA                  | 15,122             | 24                      |
|         | D5                | sau_wt_1                                                                                               | <i>S. aureus</i> USA300 LAC | TSB              | 0.088               | 24.9 ± 0.6 (n = 3) | 49,307                  |
| D6      | sau_wt_2          | <i>S. aureus</i> USA300 LAC                                                                            | TSB                         | 0.112            | 24.9 ± 0.6 (n = 3)  | 38,426             | 136                     |
|         | sau_je2_1         | <i>S. aureus</i> JE2                                                                                   | TSB                         | 0.107            | NA                  | 46,719             | 107                     |
|         | sau_gbaa_1        | <i>S. aureus</i> JE2<br>SAUSA300_2515::<br><i>bursa</i> (Nebraska library<br># NE355) <sup>93,94</sup> | TSB                         | 0.103            | NA                  | 37,985             | 109                     |
| D7      | sau_wt_3          | <i>S. aureus</i> USA300 LAC                                                                            | TSB                         | NA               | 24.9 ± 0.6 (n = 3)  | 31,852             | 152                     |
| D8      | sau_je2_2         | <i>S. aureus</i> JE2                                                                                   | TSB                         | NA               | NA                  | 21,006             | 210                     |
|         | sau_je2_pgbaal_1  | <i>S. aureus</i> JE2 pJC1111-<br><i>P<sub>GbaA-L</sub>-sGFP</i>                                        | TSB                         | NA               | NA                  | 17,206             | 250                     |
|         | sau_gbaa_pgbaal_1 | <i>S. aureus</i> JE2<br>SAUSA300_2515::<br><i>bursa</i><br>pJC1111- <i>P<sub>GbaA-L</sub>-sGFP</i>     | TSB                         | NA               | NA                  | 13,420             | 225                     |

1665

1666 **Table S2: DNA oligos used for smFISH**

| Gene        | Number of probes | Probe sequences (5' - 3')                                                                                                                                                                                                                                                                   |                                                                                                                                                                                                                                                                                               | Source    |
|-------------|------------------|---------------------------------------------------------------------------------------------------------------------------------------------------------------------------------------------------------------------------------------------------------------------------------------------|-----------------------------------------------------------------------------------------------------------------------------------------------------------------------------------------------------------------------------------------------------------------------------------------------|-----------|
| <i>dnaA</i> | 24               | TGCCAAAGCGAAAGTGACAC<br>AATTCTGTGGCTGGTAACTC<br>CAATGGGCGTATCCACATAC<br>AGCGTGTTATCGCTCAGTTC<br>GCAGAACTGGTTAGCAGTC<br>CGACTTCAAACGCAGCTGT<br>AGAACGATAGGTCGGTTCTG<br>ACGTGTGTTTGACGTTTACG<br>CGCCAGTTGGTTAGATTTAC<br>ATGCAGCAGGTGAGTTTTAC<br>TAAACCACTTTGGCATTCCG<br>TTTGCAGGGCTTTAACCATG  | ATCTACGGAACGGTAGTAGC<br>GAATATCGTCGATCAGCAGT<br>GGCGTTGAAGGTGTGGAAAA<br>ATAGCGATCCGAGGTGAGAA<br>CAACGCCGTTGATCTCTTTC<br>TTTTTCATCAGGATCGCCAC<br>ACGAATGTCGTTTTTCGTCGG<br>GTACGTTAGATCGTAGACGC<br>GGTAAAGTTGGCATTGGCAA<br>CCGTCTTCTGAATATTGTCG<br>CGCGACTTTGATCTTGTAGT<br>TGTGGTTAGTCAGCTCTTTC | This work |
| <i>nrdA</i> | 24               | CAATCCAGAACGCGATGGAT<br>AAACTGAATGTGGGAGCGCA<br>ATGTCAGAGGTCTTGATACC<br>CAGCCTTGATAATGGTTTCG<br>CGCGGCGAGATACTGATAAT<br>TTTACGCAGGTGGAAGATCG<br>ATCTCGACCATTTTCACCAC<br>GAACTCTTCTCCGTGTAGT<br>CGATAAAGGTGTCCATCTGC<br>AAGGTCATATCACGGTCGTG<br>CTGCTTAACGGCAGCATAAG<br>ATATAAAGGAACTGGGCGCT | GGGTAGTTGAGAAACAAGCA<br>ATATTGCAGGCGCGTTTTAC<br>AACCGCGTCGTAAAAACGCT<br>CGTCGGCAGCGAAATTTTAA<br>TTGATGGAATCCAGGCTGTC<br>TTGTAGAACGGAATGCAGCC<br>TTTCACCGCTGTCTGGAAT<br>CGGTTGTTTTTCAACACCAG<br>CTTTCAGCAGACGGGTATAC<br>GCTGAACAGGGTGATATCTT<br>GACGTTCAAACCTTCTCTGA<br>CTGCATCATCAGCGAGAACA   | This work |

|             |    |                                                                                                                                                                                                                                                                                               |                                                                                                                                                                                                                                                                                                |           |
|-------------|----|-----------------------------------------------------------------------------------------------------------------------------------------------------------------------------------------------------------------------------------------------------------------------------------------------|------------------------------------------------------------------------------------------------------------------------------------------------------------------------------------------------------------------------------------------------------------------------------------------------|-----------|
| <i>nemA</i> | 24 | CTTTCAGTGGGGAATACAGT<br>GTCAGCGGTGCCATAAAAAT<br>CATCAACGGGGTAGGAATGT<br>GCACGTTGGCGATAGTATTC<br>CTTTTGCCTGGGCAGAAATT<br>AATTTGCTCCGGACTATGGA<br>GACCATTTTCAGCATGAACG<br>ATCGCCTGACCATTTTCATC<br>CGGCATGGATGTTTCAACAC<br>AATCTCTTCCAGTTCAAGCG<br>GCTCTACCAGATCAAAACCG<br>AAATAACCGTGAGCAGAGTG  | AGGAGAAAGGAACTGATGCA<br>TACCAAACGTGCGCGATTTT<br>CATTCTTCAATCCCGGC<br>AACGCGAATGCCAATGCGAT<br>TCTGGAAAGTACCGATTGGT<br>TTCATTGCGGGCCGTTATCTG<br>ATCAGATACAGTGCATCGGC<br>ATAAGCAATGCCGCGTTTAC<br>TTTGCCGATCAGCGTTTCAG<br>TGTGGGTTAAGCTCAGCTTT<br>ACCGTAGAACTTTCCGGCAC<br>ACGTCGGGTAATCGGTATAG     | This work |
| <i>metN</i> | 24 | TGGTGGAACACTTTGGTGAT<br>GCACCGATAACGCCATAAAT<br>TATAAGCGTACTCTTACCCG<br>GCTCCAGCAGGTTTACACAA<br>TTGGTCAACTCGGATTCTGA<br>AAATCATACCAATCTGGCGG<br>AGAGCCACGTTGCCAAAAAC<br>GACGTTTGACCTCGTCTTTC<br>CAATGACAGCAATTCCGTCA<br>CAATTGCCACACGTTGTTTC<br>TTTGGGATTGCTGGCTAACG<br>TGGCTTCATCACACAGCAAT  | GAATAGAACGTGTCGTTGCC<br>AACAGAATCGTCAACCCAG<br>TTCACAACGTCCATTTTCGTG<br>GAATAAACTTCTGCGCCAGC<br>AGACGTTTCTGGTAATCTTC<br>ACGCAGTCAGTAAATGGCTC<br>ATTGACCGGTAAACTCCAGA<br>TTCAGAAAGCAGTGGGGCAT<br>CTGCGCGCTAATAATGTTGT<br>CTTGCATCTTGTGTTGTG<br>TTTACATGGTGTTCCTGCAG<br>GACATAACCCAGTACCTCTA     | This work |
| <i>rho</i>  | 24 | TATTTTCGCCGAGAGTGATC<br>AATGTCCTGCTTACGCATAC<br>TATCTCCAGTACGCCATCAC<br>GGAAACCAAATCCATCCTGC<br>GGCGAATCTTACCAGAGATG<br>TTCGTTAACTTTACGACGCG<br>GCGGGGTTAAGTTCTCAAAG<br>AGTAGAACCGTTACCACGTT<br>GTACGCGAGCAGTTAAATCT<br>CATGGTTTTACCGGCTTTTCG<br>ATGCTCTGAGCAATGTTCTG<br>TCGATCAGCAGAACCATCAG | TGCATCTCGGTTACTTCTTC<br>GTTTCGTCAAAGGTAGAAGCA<br>CTTCTCGATCACCATTTCCG<br>AGTGATGGAGTCGAGCAGAA<br>AACAAACGGTGTGTAAGCGC<br>CACCAAAGAAGCGTTTCGGA<br>AGAACCGGTATCGATAAGCG<br>TTACGAGAGAGGTGCAGTTC<br>GAAGACGCGTTTTTTCAGCGA<br>CAGCTCTTCTTTACGGGTAC<br>GTGAATGATTTTGCAGGGA<br>TTCCATTGCATCGATTTTCGC | This work |

|             |    |                                                                                                                                                                                                                                                                                                                                                                    |                                                                                                                                                                                                                                                                                                                                                                    |           |
|-------------|----|--------------------------------------------------------------------------------------------------------------------------------------------------------------------------------------------------------------------------------------------------------------------------------------------------------------------------------------------------------------------|--------------------------------------------------------------------------------------------------------------------------------------------------------------------------------------------------------------------------------------------------------------------------------------------------------------------------------------------------------------------|-----------|
| <i>cspA</i> | 8  | CGATACCAGTCATTTTACCG<br>TTGTCAGCGTTGAACCATT<br>TCAGGAGTGATGAAGCCGAA<br>CGAACACATCTTTAGAGCCA                                                                                                                                                                                                                                                                        | GTTCTGGATAGCAGAGAAGT<br>CGTCCAGAGATTTGTAACCA<br>GTGAAGGACACTTTCTGACC<br>TACAGGCTGGTTACGTTACC                                                                                                                                                                                                                                                                       | This work |
| <i>cl</i>   | 30 | GGTTTCTTTTTTGTGCTCAT<br>CTCAAGCTGCTCTTGTTA<br>AATTGCTTTAAGGCGACGTG<br>GGGATAAGCCAAGTTCATTT<br>ATCTTGTCTGCGACAGATTC<br>AATAAAGCACCAACGCCTGA<br>GCATTTAATGCATTGATGCC<br>TGCAAGCAATGCGGCGTTAT<br>CTTCAACGCTAACTTTGAGA<br>CTGGCGATTGAAGGGCTAAA<br>CGCTTCATACATCTCGTAGA<br>TAAGTGACGGCTGCATACTA<br>ACAGGGTACTCATACTCACT<br>CCCTGCCTGAACATGAGAAA<br>TTCTAAGCTCAGGTGAGAAC | TCCGCATCACCTTTGGTAAA<br>TTTGGTTGTGCTTACCCATC<br>AGAATGCAGAATCACTGGCT<br>CGGTCATGGAATTACCTTCA<br>AGCTTGGCTTGGAGCCTGTT<br>AGAATTAACATTCCGTCAGG<br>AACAGCCTGCTCAGGGTCAA<br>CTATGCAGAAATCACCTGGC<br>AACTCATCACCCCAAGTCT<br>CCTGATCAGTTTCTTGAAGG<br>GTAAAAACACCTGACCGCTA<br>TTGGTACTGTGGGTTTAGT<br>CAACTCTCATTGCATGGGAT<br>AGCGATAACTTTCCCCACAA<br>AAACGTCTCTTCAGGCCACT | 95        |

1667



1668 **Table S3: Sample sizes for smFISH datasets**

| Gene                         | Number of cells in smFISH dataset 1 | Number of cells in smFISH dataset 2 |
|------------------------------|-------------------------------------|-------------------------------------|
| <i>dnaA</i>                  | 2701                                | 1772                                |
| <i>nrdA</i>                  | 1481                                | 1203                                |
| <i>nemA</i>                  | 1077                                | 2582                                |
| <i>metN</i>                  | 1370                                | 1892                                |
| <i>rho</i>                   | 2113                                | 823                                 |
| <i>cspA</i>                  | 572                                 | 1772                                |
| <i>cl</i> (Negative control) | 841                                 | 1309                                |

1669

1670 **Table S4: Evidence of repressed state in high-amplitude cell cycle expression clusters.**  
 1671 Evidence that genes within *E. coli* clusters Ec9 and Ec17 (Fig. 5C & D) are autorepressed or  
 1672 otherwise in a repressed state. Besides the sources listed, the EcoCyc<sup>77,96</sup> database was used  
 1673 as a major source of information.

| Gene ID | Gene name   | Description                                                          | Cluster | Operon            | Regulation/evidence of repression                                                                                                                      | Ref.    |
|---------|-------------|----------------------------------------------------------------------|---------|-------------------|--------------------------------------------------------------------------------------------------------------------------------------------------------|---------|
| b3872   | <i>yihL</i> | Putative DNA-binding transcriptional regulator                       | Ec17    | <i>yihLM</i>      | Nac-repressed; <i>yihL</i> is a GntR-family regulator so may have repressor function; <i>yihM</i> is induced by hexane so may have specific regulation | 97,98   |
| b4017   | <i>arpA</i> | Regulator of acetyl CoA synthetase                                   | Ec17    | <i>arpA</i>       | Unknown, but gene immediately downstream of the autorepressed transcription factor <i>iclR</i>                                                         |         |
| b4018   | <i>iclR</i> | DNA-binding transcriptional repressor IclR                           | Ec17    | <i>iclR</i>       | Autorepression (also represses <i>aceBAK</i> operon)                                                                                                   | 99      |
| b4191   | <i>ulaR</i> | DNA-binding transcriptional repressor UlaR                           | Ec17    | <i>ulaR</i>       | Regulation unknown but repressor of <i>ulaG</i> and <i>ulaBCDEF</i> operons                                                                            | 100     |
| b4278   | <i>insG</i> | KpLE2 phage-like element; IS4 putative transposase                   | Ec17    | <i>insG</i>       | Unknown but NanR repressor binds promoter                                                                                                              | 101     |
| b1650   | <i>nemA</i> | N-ethylmaleimide reductase                                           | Ec17    | <i>nemRA-gloA</i> | Operon autorepressed by NemR ( <i>gloA</i> partially transcribed by read-through from this operon)                                                     | 35-37   |
| b3502   | <i>arsB</i> | Arsenite/antimonite:H <sup>+</sup> antiporter                        | Ec17    | <i>arsRBC</i>     | Operon autorepressed by ArsR                                                                                                                           | 102     |
| b4014   | <i>aceB</i> | Malate synthase A                                                    | Ec9     | <i>aceBAK</i>     | Repressed by IclR; repressed by CRP in the presence of glucose                                                                                         | 103     |
| b4015   | <i>aceA</i> | Isocitrate lyase                                                     | Ec9     | <i>aceBAK</i>     | Repressed by IclR; repressed by CRP in the presence of glucose                                                                                         | 103     |
| b4016   | <i>aceK</i> | Isocitrate dehydrogenase kinase/isocitrate dehydrogenase phosphatase | Ec9     | <i>aceBAK</i>     | Repressed by IclR; repressed by CRP in the presence of glucose                                                                                         | 103     |
| b2675   | <i>nrdE</i> | Ribonucleoside-diphosphate reductase 2, $\alpha$ subunit dimer       | Ec9     | <i>nrdHIEF</i>    | Repressed by NrdR; repressed by FUR in the presence of iron                                                                                            | 104,105 |
| b2676   | <i>nrdF</i> | Ribonucleoside-diphosphate reductase 2, $\beta$ subunit dimer        | Ec9     | <i>nrdHIEF</i>    | Repressed by NrdR; repressed by FUR in the presence of iron                                                                                            | 104,105 |
| b3574   | <i>plaR</i> | DNA-binding transcriptional repressor PlaR                           | Ec9     | <i>plaR</i>       | Autorepression (also represses L-lyxose catabolism operon)                                                                                             | 106     |
| b3605   | <i>lldD</i> | L-lactate dehydrogenase                                              | Ec9     | <i>lldPRD</i>     | Autorepression by LldR within the same operon                                                                                                          | 107     |

1674
